# Supplementary material for: CO-Releasing Molecules Have Nonheme Targets in Bacteria: Transcriptomic, Mathematical Modeling and Biochemical Analyses of CORM-3 [Ru(CO)3Cl(glycinate)] Actions on a Heme-Deficient Mutant of Escherichia coli
Source: PubMed Central journal article supplement (PMC4492677; doi:10.1089/ars.2014.6151), 2015-07-10
Supplement: Supp_Figure2.pdf [file Supp_Figure2.pdf]

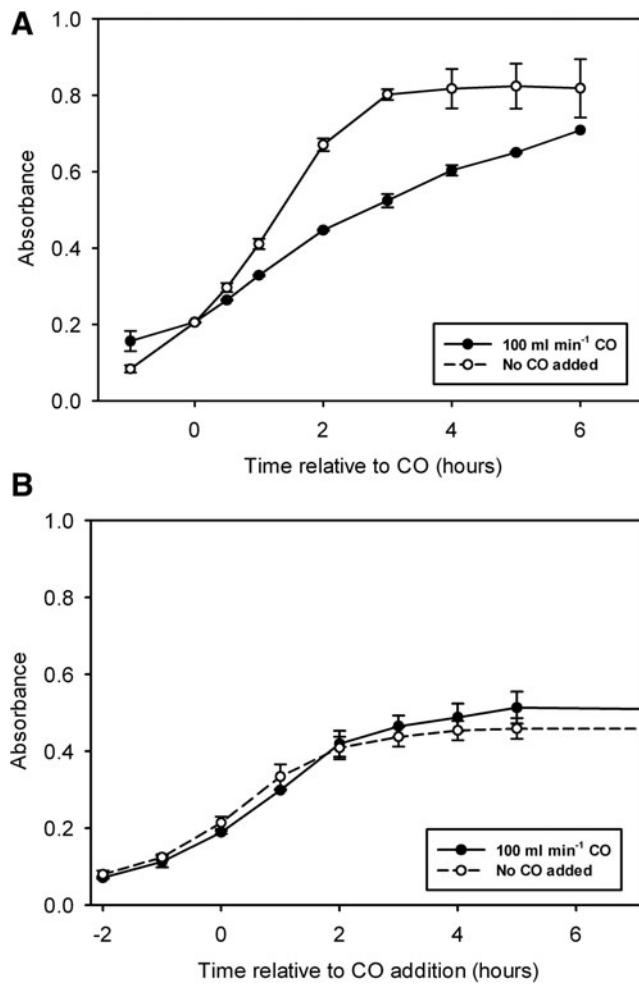

**SUPPLEMENTARY FIG. 2. Growth of the heme-deficient mutant is unaffected by CO gas.** Wild-type (A) and *hemA* (B) cultures were grown anaerobically in defined medium and bubbled with nitrogen gas at a rate of 100 ml min<sup>-1</sup>. At an OD<sub>600</sub> of ~0.2, the gas supply was switched to CO gas (*closed circles*, 100 ml min<sup>-1</sup>) or maintained as nitrogen (*open circles*) and growth was monitored. Data are plotted as means ± SEM from two biological replicates.
