# Supplementary material for: CO-Releasing Molecules Have Nonheme Targets in Bacteria: Transcriptomic, Mathematical Modeling and Biochemical Analyses of CORM-3 [Ru(CO)3Cl(glycinate)] Actions on a Heme-Deficient Mutant of Escherichia coli
Source: PubMed Central journal article supplement (PMC4492677; doi:10.1089/ars.2014.6151), 2015-07-10
Supplement: Supp_Figure3.pdf [file Supp_Figure3.pdf]

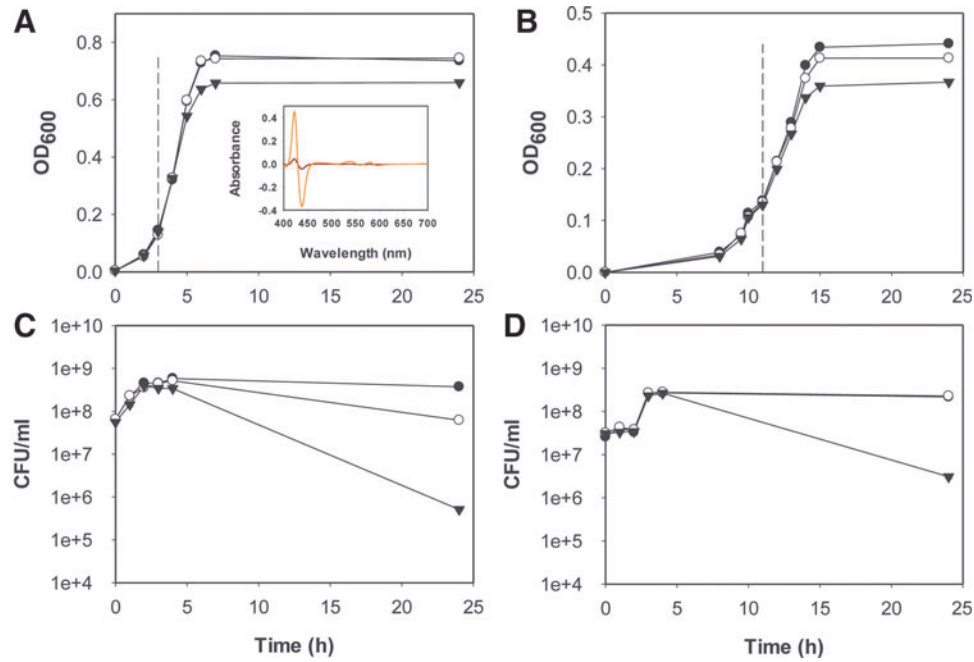

**SUPPLEMENTARY FIG. 3. Effects of iCORM-3 on wild-type and heme-deficient *E. coli*.** Cultures were grown as previously described and treated with 100  $\mu\text{M}$  (open circles) and 200  $\mu\text{M}$  (closed triangles) iCORM-3 at an  $\text{OD}_{600}$  of  $\sim 0.1$  (dashed lines). Control cultures are shown in parallel (closed circles). Effects of iCORM-3 on wild type (**A**) and mutant (**B**) growth, and wild type (**C**) and mutant (**D**) viability are shown. Note that in **D** the points for the control culture (closed circles) lie beneath those for the 100  $\mu\text{M}$  CORM-3 data (open circles). The inset in **A** shows CO difference of myoglobin tested with CORM-3 (orange) and iCORM-3 (red). For viability assays, a culture sample was taken immediately before addition of the inactive compound ( $t=0$  in **C** and **D**) followed by hourly samples for 4 h, and at 24 h to complete the experiment. Data represent the pattern seen in  $\geq 3$  biological replicates. Viability data are plotted as means  $\pm$  SEM from  $\geq 3$  individual spots. Note that the scale on the y-axis is logarithmic in base 10, hence  $1\text{e}+3 = 1000$ .
