# Supplementary material for: CO-Releasing Molecules Have Nonheme Targets in Bacteria: Transcriptomic, Mathematical Modeling and Biochemical Analyses of CORM-3 [Ru(CO)3Cl(glycinate)] Actions on a Heme-Deficient Mutant of Escherichia coli
Source: PubMed Central journal article supplement (PMC4492677; doi:10.1089/ars.2014.6151), 2015-07-10
Supplement: Supp_Figure4.pdf [file Supp_Figure4.pdf]

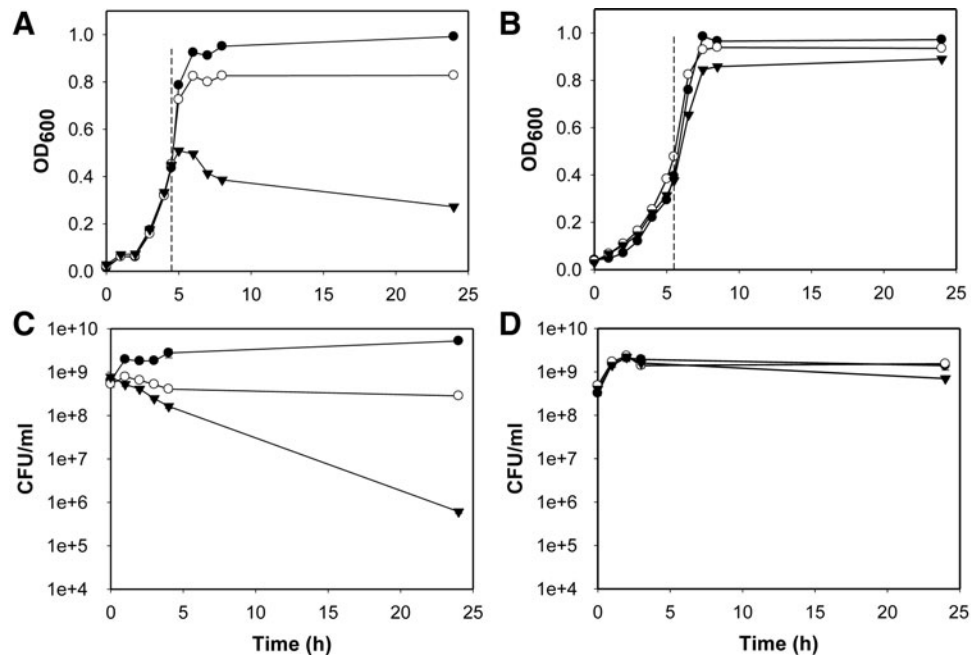

**SUPPLEMENTARY FIG. 4. CORM-3, but not iCORM-3, is bactericidal against naturally heme-deficient *Lactococcus lactis*.** Cultures were grown anaerobically in defined medium and stressed with 100  $\mu\text{M}$  (open circles) and 200  $\mu\text{M}$  (closed triangles) of compound at an  $\text{OD}_{600}$  of  $\sim 0.4$  (dashed line). The effect of CORM-3 on growth (A) and viability (C), and the effect of iCORM-3 on growth (B) and viability (D) are shown. Control cultures are shown in parallel (nothing added, closed circles). A culture sample was taken immediately before compound addition to assay for cell viability ( $t=0$  in B and D). Hourly  $\text{OD}_{600}$  readings and culture samples were taken for 3–4 h postaddition of compound, followed by a 24 h reading to complete the experiment. Data represent the pattern seen in  $\geq 3$  biological replicates. Viability data are plotted as means  $\pm$  SEM from three individual spots. Note that the scale on the y-axis is logarithmic in base 10, hence  $1\text{e}+3=1000$ .
