# Supplementary material for: CO-Releasing Molecules Have Nonheme Targets in Bacteria: Transcriptomic, Mathematical Modeling and Biochemical Analyses of CORM-3 [Ru(CO)3Cl(glycinate)] Actions on a Heme-Deficient Mutant of Escherichia coli
Source: PubMed Central journal article supplement (PMC4492677; doi:10.1089/ars.2014.6151), 2015-07-10
Supplement: Supp_Figure5.pdf [file Supp_Figure5.pdf]

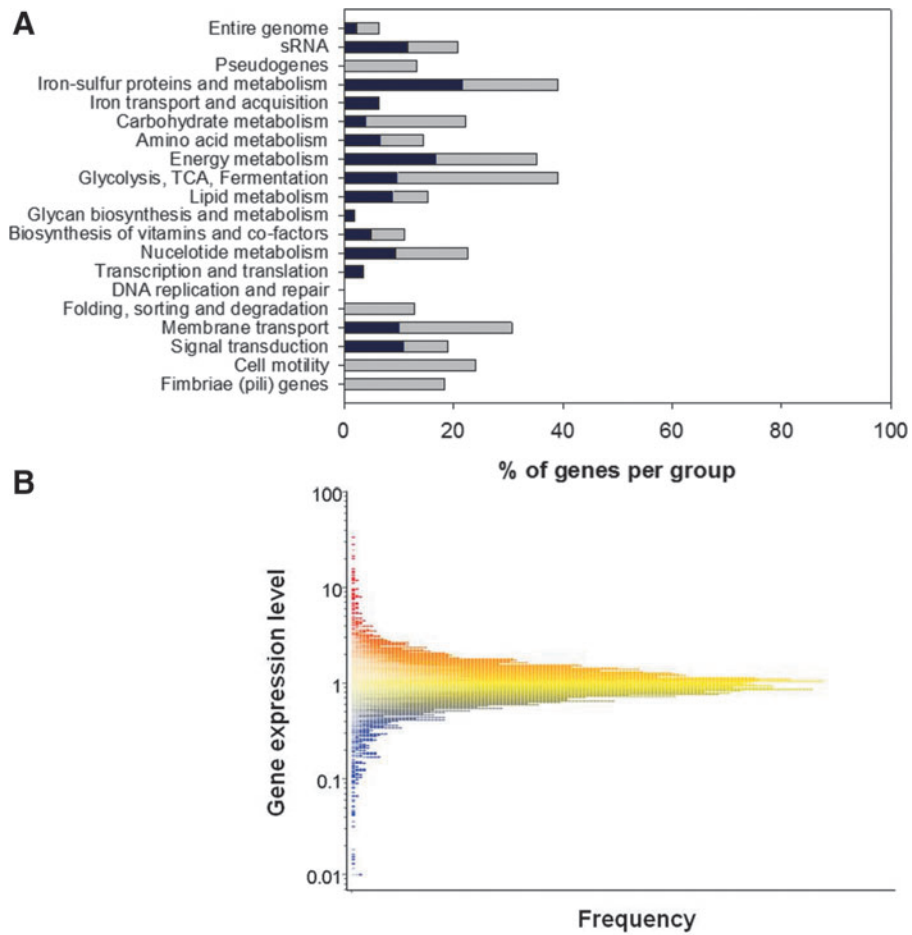

**SUPPLEMENTARY FIG. 5. Differences in gene expression between the heme-deficient mutant and wild type immediately before addition of CORM-3. (A).** The bars show the percentage of genes in functional groups with altered expression in the heme-deficient mutant *versus* wild type. The dark *blue* and *grey* bars indicate the proportion of up- and downregulated genes, respectively. **(B).** Expression profile showing the frequency of genes with altered transcription in the heme-deficient mutant *versus* wild type. *Red* indicates upregulated genes ( $\geq 2$ -fold), *blue* indicates downregulated genes ( $\geq -2$ -fold), and *yellow* represents genes with unaltered expression.
