# Supplementary material for: CO-Releasing Molecules Have Nonheme Targets in Bacteria: Transcriptomic, Mathematical Modeling and Biochemical Analyses of CORM-3 [Ru(CO)3Cl(glycinate)] Actions on a Heme-Deficient Mutant of Escherichia coli
Source: PubMed Central journal article supplement (PMC4492677; doi:10.1089/ars.2014.6151), 2015-07-10
Supplement: Supp_Figure7.pdf [file Supp_Figure7.pdf]

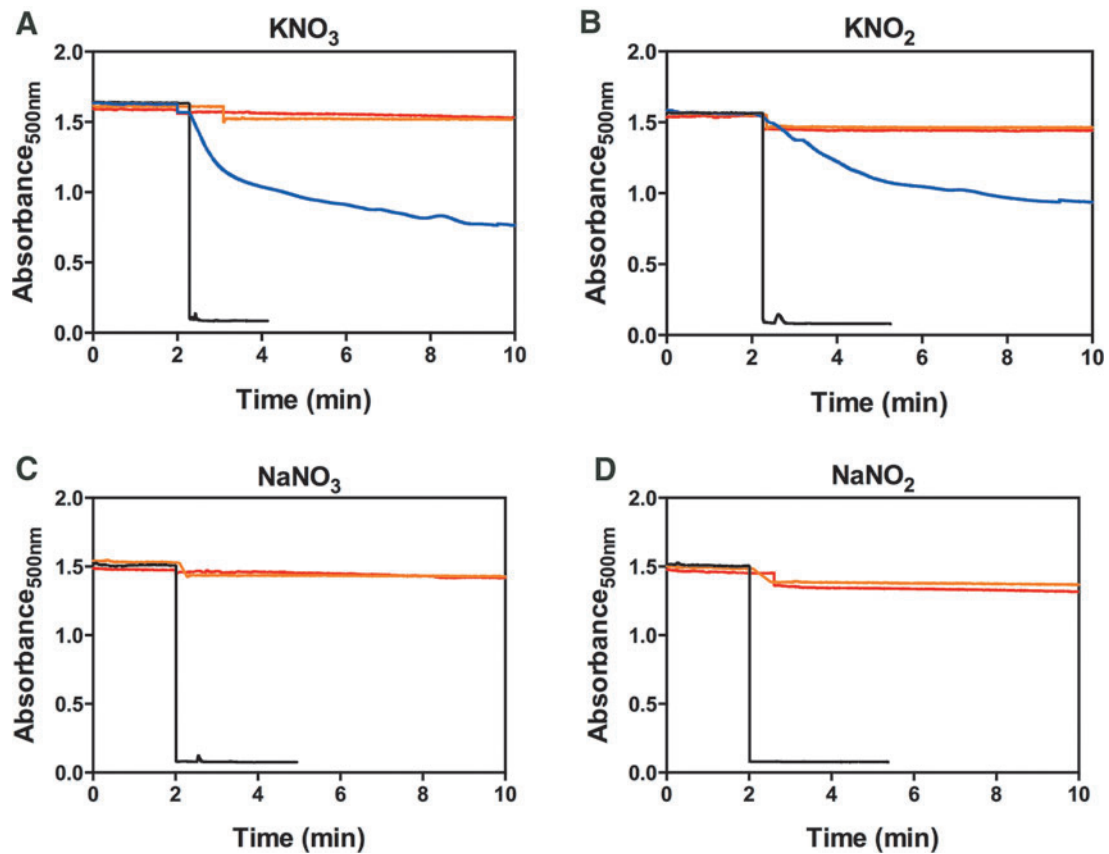

**SUPPLEMENTARY FIG. 7. CORM-3 does not promote K<sup>+</sup> and Na<sup>+</sup> fluxes across the membrane of *hemA* cells.** Osmotic behavior of *hemA* spheroplast suspensions (OD<sub>500nm</sub> of ~ 1.5) in (A) 0.25 M potassium nitrate (KNO<sub>3</sub>), (B) 0.25 M potassium nitrite (KNO<sub>2</sub>), (C) 0.25 M sodium nitrate (NaNO<sub>3</sub>), or (D) 0.25 M sodium nitrite (KNO<sub>2</sub>) with additions of Triton-X-100 (*black line*), valinomycin (*blue line*), CO gas (*orange line*), or 200 μM CORM-3 (*red line*). Data are representative of three biological replicates.
